# Supplementary material for: Cryptocurrency trading and its relationship with other addictions among healthcare professionals in Türkiye
Source: PeerJ. 2025 Apr 28;13:e19314. doi: 10.7717/peerj.19314 (PMC12045263; doi:10.7717/peerj.19314)
Supplement: Supplemental Information 2 [file peerj-13-19314-s002.xlsx]

## Sheet: SPSS
gender	age	income status	occupation	educational status	marital status	having child	Smoking usage	Number of cigarettes	Smoking duration	Psychiatric disorder	Cryptocurrency trading	Cryptocurrency value tracking	Frequency of cryptocurrency trading	Average daily trading volume	Duration of trades	Average trading amount	PCTS1	PCTS2	PCTS3	PCTS4	PCTS5	PCTS6	PCTS7	PCTS8	PCTS9	PCTS10	PCTS11	PCTS12	PCTS13	PCTS14	PCTS15	GDST1	GDST2	GDST3	GDST4	GDST5	GDST6	GDST7	GDST8	GDST9	GDST10	GDST11	totalGDST	Horse racing	Card games	Dice games	Cockfighting	Sports betting predictions	Sports lottery
1	24	4	1	5	1	2	2	#NULL!	#NULL!	2	2	5	#NULL!	#NULL!	#NULL!	#NULL!	1	1	1	1	1	1	3	1	1	1	1	1	1	1	1	1	1	1	1	1	1	1	1	1	1	1	0	1	1	2	1	1	1
1	14	4	1	4	1	2	2	#NULL!	#NULL!	4	2	5	#NULL!	#NULL!	#NULL!	#NULL!	1	1	1	1	1	1	1	1	1	1	1	1	1	1	1	1	1	1	1	1	1	1	1	1	1	1	0	1	1	1	1	1	1
1	14	4	1	4	1	2	2	#NULL!	#NULL!	1	2	#NULL!	#NULL!	#NULL!	#NULL!	#NULL!	1	1	1	1	1	1	1	1	1	1	1	1	1	1	1	1	1	1	1	1	1	1	1	1	1	1	0	1	1	1	1	1	1
2	18	4	1	3	1	2	1	#NULL!	#NULL!	1	1	5	1	#NULL!	3	3	2	1	1	1	1	1	1	1	1	1	1	1	1	1	1	1	1	1	1	1	1	1	1	1	1	1	0	1	1	1	1	1	1
1	10	5	1	4	1	2	2	#NULL!	#NULL!	1	2	#NULL!	#NULL!	#NULL!	#NULL!	#NULL!	1	1	1	1	1	1	1	1	1	1	1	1	1	1	1	1	1	1	1	1	1	1	1	1	1	1	0	1	1	1	1	1	1
2	13	5	1	3	1	2	2	#NULL!	#NULL!	1	2	#NULL!	#NULL!	#NULL!	#NULL!	#NULL!	1	1	1	1	1	1	1	1	1	1	1	1	1	1	1	1	1	1	1	1	1	1	1	1	1	1	0	1	1	1	1	2	1
2	17	5	1	4	1	2	2	#NULL!	#NULL!	1	2	#NULL!	#NULL!	#NULL!	#NULL!	#NULL!	1	1	1	1	1	1	1	1	1	1	1	1	1	1	1	1	1	1	1	1	1	1	1	1	1	1	0	1	2	1	1	2	1
2	16	5	1	5	1	2	2	#NULL!	#NULL!	1	2	#NULL!	#NULL!	#NULL!	#NULL!	#NULL!	1	1	1	1	1	1	1	1	1	1	1	1	1	1	1	1	1	1	1	1	1	1	1	1	1	1	0	1	1	1	1	2	1
1	10	4	1	3	2	2	2	#NULL!	#NULL!	1	2	#NULL!	#NULL!	#NULL!	#NULL!	#NULL!	1	1	1	1	1	1	1	1	1	1	1	1	1	1	1	1	1	1	1	1	1	1	1	1	1	1	0	1	1	1	1	1	1
1	27	4	1	5	2	2	2	#NULL!	#NULL!	1	2	5	#NULL!	#NULL!	#NULL!	#NULL!	1	1	1	1	1	1	1	1	1	1	1	1	1	1	1	1	1	1	1	1	1	1	1	1	1	1	0	1	1	1	1	1	1
2	34	4	1	5	2	2	2	#NULL!	#NULL!	2	2	#NULL!	#NULL!	#NULL!	#NULL!	#NULL!	1	1	1	1	1	1	1	1	1	1	1	1	1	1	1	1	1	1	1	1	1	1	1	1	1	1	0	1	1	1	1	1	1
1	31	5	1	4	2	2	1	5	4	1	2	#NULL!	#NULL!	#NULL!	#NULL!	#NULL!	1	1	1	1	1	1	1	1	1	1	1	1	1	1	1	1	1	1	1	1	1	1	1	1	1	1	0	1	1	1	1	1	1
2	22	5	1	5	2	2	1	5	4	2	2	#NULL!	#NULL!	#NULL!	#NULL!	#NULL!	1	1	1	1	1	1	1	1	1	1	1	1	1	1	1	1	1	1	1	1	1	1	1	1	1	1	0	1	1	1	1	1	1
1	14	4	1	5	2	2	2	#NULL!	#NULL!	2	2	#NULL!	#NULL!	#NULL!	#NULL!	#NULL!	1	1	1	1	1	1	1	1	1	1	1	1	1	1	1	1	1	1	1	1	1	1	1	1	1	1	0	1	1	1	1	2	1
1	18	3	1	3	1	1	2	#NULL!	#NULL!	2	1	4	1	#NULL!	2	5	3	2	1	2	2	2	1	2	1	1	2	1	1	1	1	1	1	1	1	1	1	1	1	1	1	1	0	1	1	1	1	1	1
1	23	3	1	5	1	1	2	#NULL!	#NULL!	2	2	5	#NULL!	#NULL!	#NULL!	#NULL!	1	1	1	1	1	1	1	1	1	1	5	1	1	1	1	1	1	1	1	1	1	1	1	1	1	1	0	1	1	1	1	1	1
2	18	3	1	4	1	1	2	#NULL!	#NULL!	1	2	#NULL!	#NULL!	#NULL!	#NULL!	#NULL!	1	1	1	1	1	1	1	1	1	1	1	1	1	1	1	1	1	1	1	1	1	1	1	1	1	1	0	1	1	1	1	1	1
1	20	4	1	4	1	1	2	#NULL!	#NULL!	2	1	3	2	#NULL!	3	5	2	1	1	1	1	1	1	1	1	1	1	1	1	1	1	1	1	1	1	1	1	1	1	1	1	1	0	1	1	1	1	1	1
1	26	4	1	5	1	1	2	#NULL!	#NULL!	2	2	#NULL!	#NULL!	#NULL!	#NULL!	#NULL!	1	1	1	1	1	1	1	1	1	1	1	1	1	1	1	1	1	1	1	1	1	1	1	1	1	1	0	1	1	1	1	1	1
1	23	4	1	5	1	1	2	#NULL!	#NULL!	2	2	#NULL!	#NULL!	#NULL!	#NULL!	#NULL!	1	1	1	1	1	1	1	1	1	1	1	1	1	1	1	1	1	1	1	1	1	1	1	1	1	1	0	1	1	1	1	1	1
1	36	4	1	5	1	1	2	#NULL!	#NULL!	1	2	#NULL!	#NULL!	#NULL!	#NULL!	#NULL!	1	1	1	1	1	1	1	1	1	1	1	1	1	1	1	1	1	1	1	1	1	1	1	1	1	1	0	1	1	1	1	1	1
1	29	4	1	4	1	1	2	#NULL!	#NULL!	2	2	#NULL!	#NULL!	#NULL!	#NULL!	#NULL!	1	1	1	1	1	1	1	1	1	1	1	1	1	1	1	1	1	1	1	1	1	1	1	1	1	1	0	1	1	1	1	1	1
1	25	4	1	5	1	1	2	#NULL!	#NULL!	1	2	#NULL!	#NULL!	#NULL!	#NULL!	#NULL!	1	1	1	1	1	1	1	1	1	1	1	1	1	1	1	1	1	1	1	1	1	1	1	1	1	1	0	1	1	1	1	1	1
1	42	4	1	5	1	1	2	#NULL!	#NULL!	1	2	#NULL!	#NULL!	#NULL!	#NULL!	#NULL!	1	1	1	1	1	1	1	1	1	1	1	1	4	1	1	1	1	1	1	1	1	1	1	1	1	1	0	2	1	1	1	1	1
2	17	4	1	4	1	1	1	2	2	1	1	1	4	1	3	4	2	4	3	2	2	5	3	2	1	2	2	3	1	1	4	2	1	1	1	1	1	1	1	1	1	1	1	1	1	1	1	1	1
2	40	4	1	5	1	1	1	5	4	1	1	1	5	2	2	3	3	4	4	4	3	3	3	2	3	2	2	1	1	1	2	2	2	2	1	2	2	2	1	1	1	1	1	3	1	1	1	1	1
2	15	4	1	5	1	1	2	#NULL!	#NULL!	1	2	#NULL!	#NULL!	#NULL!	#NULL!	#NULL!	1	1	1	1	1	1	1	1	1	1	1	1	1	1	1	1	1	1	1	1	1	1	1	1	1	1	0	1	1	1	1	1	1
2	23	4	1	5	1	1	2	#NULL!	#NULL!	1	2	5	#NULL!	#NULL!	#NULL!	#NULL!	1	1	1	1	1	1	1	1	1	1	1	1	1	1	1	1	1	1	1	1	1	1	1	1	1	1	0	1	1	1	1	1	1
1	20	5	1	5	1	1	2	#NULL!	#NULL!	4	2	#NULL!	#NULL!	#NULL!	#NULL!	#NULL!	1	1	1	1	1	1	1	1	1	1	1	1	1	1	1	1	1	1	1	1	1	1	1	1	1	1	0	3	1	1	1	1	1
1	21	5	1	5	1	1	1	2	2	1	2	#NULL!	#NULL!	#NULL!	#NULL!	#NULL!	1	1	1	1	1	1	1	1	1	1	1	1	1	1	1	1	1	1	1	1	1	1	1	1	1	1	0	1	1	1	1	1	1
1	22	5	1	5	1	1	2	#NULL!	#NULL!	4	2	#NULL!	#NULL!	#NULL!	#NULL!	#NULL!	1	1	1	1	1	1	1	1	1	1	1	1	1	1	1	1	1	1	1	1	1	1	1	1	1	1	0	1	1	1	1	1	1
1	31	5	1	5	1	1	1	1	1	1	2	5	#NULL!	#NULL!	#NULL!	#NULL!	1	1	1	1	1	1	1	1	1	1	1	1	1	1	1	1	1	1	1	1	1	1	1	1	1	1	0	1	1	1	1	1	1
2	22	5	1	5	1	1	1	5	4	1	1	1	5	1	2	6	2	3	3	3	2	2	1	1	1	1	2	1	1	1	1	1	1	1	1	1	1	1	1	1	1	1	0	1	1	1	1	1	1
2	33	5	1	4	1	1	1	5	4	1	2	5	1	#NULL!	#NULL!	#NULL!	1	1	1	1	1	1	1	1	1	1	5	1	1	1	1	1	1	1	1	1	1	1	1	1	1	1	0	2	1	1	1	1	2
2	39	5	1	4	1	1	2	#NULL!	#NULL!	1	2	#NULL!	#NULL!	#NULL!	#NULL!	#NULL!	1	1	1	1	1	1	1	1	1	1	1	1	1	1	1	1	1	1	1	1	1	1	1	1	1	1	0	1	1	1	1	1	1
2	35	5	1	5	1	1	1	4	4	4	2	#NULL!	#NULL!	#NULL!	#NULL!	#NULL!	1	1	1	1	1	1	1	1	1	1	1	1	1	1	1	1	1	1	1	1	1	1	1	1	1	1	0	1	1	1	1	1	1
2	25	5	1	5	1	1	2	#NULL!	#NULL!	1	2	#NULL!	#NULL!	#NULL!	#NULL!	#NULL!	1	1	1	1	1	1	1	1	1	1	1	1	1	1	1	1	1	1	1	1	1	1	1	1	1	1	0	1	1	1	1	1	1
2	15	5	1	5	1	1	2	#NULL!	#NULL!	1	2	#NULL!	#NULL!	#NULL!	#NULL!	#NULL!	1	1	1	1	1	1	1	1	1	1	1	1	1	1	1	1	1	1	1	1	1	1	1	1	1	1	0	1	1	1	1	1	1
2	31	5	1	5	1	1	1	4	3	1	2	#NULL!	#NULL!	#NULL!	#NULL!	#NULL!	1	1	1	1	1	1	1	1	1	1	1	1	1	1	1	1	1	1	1	1	1	1	1	1	1	1	0	1	1	1	1	1	1
2	35	5	1	4	1	1	2	#NULL!	#NULL!	1	2	#NULL!	#NULL!	#NULL!	#NULL!	#NULL!	1	1	1	1	1	1	1	1	1	1	1	1	1	1	1	1	1	1	1	1	1	1	1	1	1	1	0	1	1	1	1	1	1
2	35	5	1	5	1	1	2	#NULL!	#NULL!	1	2	#NULL!	#NULL!	#NULL!	#NULL!	#NULL!	1	1	1	1	1	1	1	1	1	1	1	1	1	1	1	1	1	1	1	1	1	1	1	1	1	1	0	1	1	1	1	1	1
2	35	5	1	5	1	1	2	#NULL!	#NULL!	1	2	5	#NULL!	#NULL!	#NULL!	#NULL!	1	1	1	1	1	1	1	1	1	1	1	1	1	1	1	1	1	1	1	1	1	1	1	1	1	1	0	1	1	1	1	1	1
2	26	4	1	5	1	1	2	#NULL!	#NULL!	1	2	#NULL!	#NULL!	#NULL!	#NULL!	#NULL!	1	1	1	1	1	1	1	1	1	1	1	1	1	1	1	1	1	1	1	1	1	1	1	1	1	1	0	1	1	1	1	2	1
2	28	5	1	4	1	1	1	5	4	4	1	1	5	3	3	6	5	5	5	5	5	5	4	5	5	4	3	3	5	5	3	2	2	4	4	4	4	4	2	1	1	4	1	1	1	1	1	2	2
2	22	5	1	5	1	1	2	#NULL!	#NULL!	2	1	4	2	#NULL!	2	6	1	1	1	1	1	1	1	1	1	1	1	1	1	1	2	1	1	1	1	1	1	1	1	1	1	1	0	1	1	1	1	2	1
1	36	4	1	4	2	1	2	#NULL!	#NULL!	1	2	#NULL!	#NULL!	#NULL!	#NULL!	#NULL!	1	1	1	1	1	1	1	1	1	1	1	1	1	1	1	1	1	1	1	1	1	1	1	1	1	1	0	1	1	1	1	1	1
1	31	4	2	3	1	2	2	#NULL!	#NULL!	2	2	#NULL!	#NULL!	#NULL!	#NULL!	#NULL!	1	1	1	1	1	1	1	1	1	1	1	1	1	1	1	1	1	1	1	1	1	1	1	1	1	1	0	1	1	1	1	1	1
1	4	2	2	3	2	2	2	#NULL!	#NULL!	4	2	#NULL!	#NULL!	#NULL!	#NULL!	#NULL!	1	1	1	1	1	1	1	1	1	1	1	1	1	1	1	1	1	1	1	1	1	1	1	1	1	1	0	1	2	1	1	1	1
1	14	3	2	3	2	2	1	2	2	1	1	4	3	#NULL!	3	2	3	3	2	2	1	1	3	3	2	1	2	1	1	1	1	1	1	1	1	1	1	1	1	1	1	1	0	1	1	1	1	1	1
2	18	5	2	4	2	2	2	#NULL!	#NULL!	1	2	#NULL!	#NULL!	#NULL!	#NULL!	#NULL!	1	1	1	1	1	1	1	1	1	1	1	1	1	1	1	1	1	1	1	1	1	1	1	1	1	1	0	1	1	1	1	1	1
2	36	4	2	3	1	1	2	#NULL!	#NULL!	1	2	#NULL!	#NULL!	#NULL!	#NULL!	#NULL!	1	1	1	1	1	1	1	1	1	1	1	1	1	1	1	1	1	1	1	1	1	1	1	1	1	1	0	1	1	1	1	1	1
2	35	4	2	3	1	1	2	#NULL!	#NULL!	1	2	#NULL!	#NULL!	#NULL!	#NULL!	#NULL!	1	1	1	1	1	1	1	1	1	1	1	1	1	1	1	1	1	1	1	1	1	1	1	1	1	1	0	1	1	1	1	1	1
2	30	5	2	4	1	1	2	#NULL!	#NULL!	1	2	#NULL!	#NULL!	#NULL!	#NULL!	#NULL!	1	1	1	1	1	1	1	1	1	1	5	1	1	1	1	1	1	1	1	1	1	1	1	1	1	1	0	1	1	1	1	1	2
1	10	1	3	3	1	2	2	#NULL!	#NULL!	1	2	#NULL!	#NULL!	#NULL!	#NULL!	#NULL!	1	1	1	1	1	1	1	1	1	1	1	1	1	1	1	2	1	1	1	1	2	1	1	1	1	1	1	1	1	1	1	1	1
1	11	3	3	3	1	2	2	#NULL!	#NULL!	1	2	#NULL!	#NULL!	#NULL!	#NULL!	#NULL!	1	1	1	1	1	1	1	1	1	1	1	1	1	1	1	1	1	1	1	1	1	1	1	1	1	1	0	1	1	1	1	1	1
1	9	3	3	3	1	2	2	#NULL!	#NULL!	1	2	#NULL!	#NULL!	#NULL!	#NULL!	#NULL!	1	1	1	1	1	1	1	1	1	1	1	1	1	1	1	1	1	1	1	1	1	1	1	1	1	1	0	1	1	1	1	1	1
1	14	5	3	3	1	2	2	#NULL!	#NULL!	1	2	#NULL!	#NULL!	#NULL!	#NULL!	#NULL!	1	1	1	1	1	1	1	1	1	1	1	1	1	1	1	1	1	1	1	1	1	1	1	1	1	1	0	1	1	1	1	1	2
2	14	5	3	3	1	2	2	#NULL!	#NULL!	1	2	#NULL!	#NULL!	#NULL!	#NULL!	#NULL!	1	1	1	1	1	1	1	1	1	1	1	1	1	1	1	1	1	1	1	1	1	1	1	1	1	1	0	1	1	1	1	1	2
2	9	4	3	3	1	2	1	3	3	1	1	1	1	#NULL!	3	1	1	2	1	1	1	1	1	2	1	1	1	1	1	1	1	2	1	1	1	1	2	1	1	1	1	1	0	1	1	1	1	2	1
1	8	1	3	3	2	2	2	#NULL!	#NULL!	1	1	5	1	#NULL!	1	1	2	2	2	2	2	2	3	3	2	3	3	2	2	2	2	1	1	1	1	1	1	1	1	1	1	1	0	1	1	1	1	1	1
1	8	1	3	3	2	2	2	#NULL!	#NULL!	1	2	5	#NULL!	#NULL!	#NULL!	#NULL!	1	1	1	1	1	1	1	1	1	1	1	1	1	1	1	1	1	1	1	1	1	1	1	1	1	1	0	1	3	1	1	1	1
1	5	1	3	3	2	2	2	#NULL!	#NULL!	1	2	5	#NULL!	#NULL!	#NULL!	#NULL!	1	1	1	1	1	1	1	1	1	1	1	1	1	1	1	1	1	1	1	1	1	1	1	1	1	1	0	1	1	1	1	1	1
1	8	1	3	3	2	2	2	#NULL!	#NULL!	6	2	#NULL!	#NULL!	#NULL!	#NULL!	#NULL!	1	1	1	1	1	1	1	1	1	1	1	1	1	1	1	1	1	1	1	1	1	1	1	1	1	1	0	1	1	1	1	1	1
1	7	2	3	3	2	2	2	#NULL!	#NULL!	1	2	#NULL!	#NULL!	#NULL!	#NULL!	#NULL!	1	1	1	1	1	1	1	1	1	1	1	1	1	1	1	1	1	1	1	1	1	1	1	1	1	1	0	1	1	1	1	1	1
1	11	2	3	4	2	2	2	#NULL!	#NULL!	1	2	#NULL!	#NULL!	#NULL!	#NULL!	#NULL!	1	1	1	1	1	1	1	1	1	1	1	1	1	1	1	1	1	1	1	1	1	1	1	1	1	1	0	1	1	1	1	1	1
1	8	2	3	3	2	2	1	1	2	1	2	#NULL!	#NULL!	#NULL!	#NULL!	#NULL!	1	1	1	1	1	1	1	1	1	1	1	1	1	1	1	1	1	1	1	1	1	1	1	1	1	1	0	1	1	1	1	1	1
1	5	2	3	3	2	2	2	#NULL!	#NULL!	1	2	#NULL!	#NULL!	#NULL!	#NULL!	#NULL!	1	1	1	1	1	1	1	1	1	1	1	1	1	1	1	1	1	1	1	1	1	1	1	1	1	1	0	1	1	1	1	1	1
1	18	2	3	3	2	2	2	#NULL!	#NULL!	1	2	#NULL!	#NULL!	#NULL!	#NULL!	#NULL!	1	1	1	1	1	1	1	1	1	1	1	1	1	1	1	1	1	1	1	1	1	1	1	1	1	1	0	1	1	1	1	1	1
2	8	2	3	3	2	2	1	2	3	1	2	#NULL!	#NULL!	#NULL!	#NULL!	#NULL!	1	1	1	1	1	1	1	1	1	1	1	1	1	1	1	1	1	1	1	1	1	1	1	1	1	1	0	1	1	1	1	1	1
2	8	2	3	3	2	2	1	4	3	1	2	#NULL!	#NULL!	#NULL!	#NULL!	#NULL!	1	1	1	1	1	1	1	4	1	1	1	1	1	1	1	1	1	1	1	1	1	1	1	1	1	1	0	1	1	1	1	1	1
1	14	3	3	3	2	2	1	3	4	4	2	#NULL!	#NULL!	#NULL!	#NULL!	#NULL!	1	1	1	1	1	1	1	1	1	1	1	1	1	1	1	1	1	1	1	1	1	1	1	1	1	1	0	1	1	1	1	1	1
1	9	3	3	3	2	2	2	#NULL!	#NULL!	4	2	#NULL!	#NULL!	#NULL!	#NULL!	#NULL!	1	1	1	1	1	1	1	1	1	1	1	1	1	1	1	1	1	1	1	1	1	1	1	1	1	1	0	1	1	1	1	1	1
2	7	3	3	3	2	2	1	3	2	1	1	4	1	#NULL!	5	3	3	3	1	1	1	1	1	1	1	1	1	1	1	2	1	1	1	1	1	1	1	1	1	1	1	1	0	1	1	1	1	1	1
2	7	3	3	3	2	2	1	3	2	1	2	#NULL!	#NULL!	#NULL!	#NULL!	#NULL!	1	1	1	1	1	1	1	4	1	4	1	3	3	2	3	2	2	2	2	2	3	1	1	3	1	2	1	1	1	1	1	1	1
2	10	3	3	3	2	2	1	4	3	1	2	#NULL!	#NULL!	#NULL!	#NULL!	#NULL!	1	1	1	1	1	1	1	1	1	1	1	1	1	1	1	1	1	1	1	1	1	1	1	1	1	1	0	1	1	1	1	1	1
2	7	3	3	3	2	2	1	4	3	1	2	#NULL!	#NULL!	#NULL!	#NULL!	#NULL!	1	1	1	1	1	1	1	1	1	1	1	1	1	1	1	1	1	1	1	1	1	1	1	1	1	1	0	1	1	1	1	1	1
1	8	4	3	3	2	2	2	#NULL!	#NULL!	1	2	#NULL!	#NULL!	#NULL!	#NULL!	#NULL!	3	3	3	3	3	3	3	3	3	3	3	3	3	3	3	1	1	1	1	1	1	1	1	1	1	1	0	1	1	1	1	1	1
2	12	4	3	3	2	2	1	5	3	1	1	1	4	#NULL!	2	6	4	3	3	4	2	5	2	4	3	2	2	4	1	1	4	4	2	2	3	3	4	3	1	1	1	2	1	1	2	2	3	1	3
2	7	4	3	3	2	2	1	3	3	1	1	5	1	2	5	4	3	3	2	1	1	2	2	1	1	3	4	3	1	1	1	1	1	1	1	1	1	1	1	1	1	1	0	1	1	1	1	1	1
2	9	5	3	4	2	2	2	#NULL!	#NULL!	1	1	5	1	#NULL!	2	6	4	2	1	1	1	2	2	2	2	2	4	1	1	1	1	1	1	1	1	1	1	1	1	1	1	1	0	1	1	1	1	1	1
2	40	5	3	4	2	2	2	#NULL!	#NULL!	1	2	#NULL!	#NULL!	#NULL!	#NULL!	#NULL!	1	1	1	1	1	1	1	1	1	1	1	1	1	1	1	1	1	1	1	1	1	1	1	1	1	1	0	1	1	1	1	1	2
2	7	2	3	3	2	2	1	3	3	1	2	#NULL!	#NULL!	#NULL!	#NULL!	#NULL!	1	1	1	1	1	1	1	1	1	1	1	1	1	1	1	1	1	1	1	1	1	1	1	1	1	1	0	1	2	1	1	2	2
1	25	3	3	4	2	2	1	2	4	6	1	1	2	1	2	2	5	1	1	2	1	1	1	1	2	1	1	1	1	1	1	1	1	1	1	1	1	1	1	1	1	1	0	1	1	1	1	2	2
2	7	3	3	3	2	2	2	#NULL!	#NULL!	1	1	5	1	#NULL!	2	5	4	2	1	1	1	1	1	1	1	1	2	1	1	1	1	2	1	1	2	2	1	1	1	1	1	1	0	1	1	1	1	2	2
2	8	3	3	3	2	2	1	4	2	1	1	2	4	1	4	3	4	4	2	3	2	4	2	2	2	1	3	1	1	2	2	1	1	1	2	2	3	1	1	1	1	1	0	1	2	2	1	2	1
2	8	2	3	3	2	2	1	3	2	1	1	3	2	1	4	5	3	2	1	1	1	1	1	2	1	1	1	1	1	1	1	2	1	1	1	2	2	1	1	1	1	1	0	1	1	1	1	3	1
2	11	3	3	3	2	2	1	4	3	1	1	2	5	1	3	6	4	1	1	2	1	4	2	4	2	1	1	1	3	1	1	2	2	3	2	3	3	2	2	1	1	3	1	1	1	1	1	3	2
1	19	1	3	3	1	1	1	1	2	4	2	#NULL!	#NULL!	#NULL!	#NULL!	#NULL!	1	1	1	1	1	1	1	2	1	1	3	1	1	1	1	1	1	1	1	1	1	1	1	1	1	1	0	1	1	1	1	1	1
1	29	2	3	4	1	1	1	1	1	1	1	1	4	1	2	1	3	2	2	3	3	1	1	1	2	1	4	1	1	1	1	1	1	1	1	1	1	1	1	1	1	1	0	1	1	1	1	1	1
1	18	2	3	3	1	1	1	1	2	1	1	5	1	3	5	1	1	1	1	1	1	1	1	1	1	1	1	1	1	1	1	1	1	1	1	1	1	1	1	1	1	1	0	1	1	1	1	1	1
1	18	2	3	3	1	1	1	2	4	4	2	5	1	#NULL!	#NULL!	#NULL!	1	1	1	1	1	1	1	1	1	1	1	1	1	1	3	1	1	1	1	1	1	1	1	1	1	1	0	1	1	1	1	1	1
1	36	2	3	3	1	1	2	#NULL!	#NULL!	6	2	#NULL!	#NULL!	#NULL!	#NULL!	#NULL!	1	1	1	1	1	1	1	1	1	1	1	1	1	1	1	1	1	1	1	1	1	1	1	1	1	1	0	1	1	1	1	1	1
1	33	2	3	3	1	1	2	#NULL!	#NULL!	4	2	#NULL!	#NULL!	#NULL!	#NULL!	#NULL!	1	1	1	1	1	1	1	1	1	1	1	1	1	1	1	1	1	1	1	1	1	1	1	1	1	1	0	1	1	1	1	1	1
1	27	2	3	2	1	1	2	#NULL!	#NULL!	4	2	#NULL!	#NULL!	#NULL!	#NULL!	#NULL!	1	1	1	1	1	1	1	1	1	1	1	1	1	1	1	1	1	1	1	1	1	1	1	1	1	1	0	1	1	1	1	1	1
1	15	3	3	3	1	1	1	2	3	1	1	2	1	#NULL!	3	4	2	1	1	2	1	2	3	3	1	1	3	1	1	1	1	1	1	1	1	1	1	1	1	1	1	1	0	1	1	1	1	1	1
1	23	3	3	3	1	1	2	#NULL!	#NULL!	1	1	1	5	1	1	1	3	3	2	2	1	2	1	2	1	1	5	1	1	1	1	1	1	1	1	1	1	1	1	1	1	1	0	1	1	1	1	1	1
1	15	3	3	3	1	1	2	#NULL!	1	1	1	5	#NULL!	#NULL!	2	5	2	3	2	2	2	1	1	2	1	1	5	1	1	1	1	3	3	3	2	1	1	1	1	1	1	1	1	1	1	1	1	1	1
1	17	3	3	2	1	1	1	2	4	4	1	3	1	1	1	1	1	1	1	1	1	1	1	1	1	1	1	1	1	1	1	1	1	1	1	1	1	1	1	1	1	1	0	1	1	1	1	1	1
1	17	3	3	2	1	1	1	2	4	4	2	#NULL!	#NULL!	#NULL!	#NULL!	#NULL!	1	1	1	1	1	1	1	1	1	1	1	1	1	1	1	1	1	1	1	1	1	1	1	1	1	1	0	1	1	1	1	1	1
1	20	3	3	2	1	1	2	#NULL!	#NULL!	6	2	#NULL!	#NULL!	#NULL!	#NULL!	#NULL!	1	1	1	1	1	1	1	1	1	1	1	1	1	1	1	1	1	1	1	1	1	1	1	1	1	1	0	1	1	1	1	1	1
1	19	3	3	4	1	1	2	#NULL!	#NULL!	1	2	#NULL!	#NULL!	#NULL!	#NULL!	#NULL!	1	1	1	1	1	1	1	1	1	1	1	1	1	1	1	1	1	1	1	1	1	1	1	1	1	1	0	1	1	1	1	1	1
1	28	3	3	3	1	1	2	#NULL!	#NULL!	1	2	#NULL!	#NULL!	#NULL!	#NULL!	#NULL!	1	1	1	1	1	1	1	1	1	1	1	1	1	1	1	1	1	1	1	1	1	1	1	1	1	1	0	1	1	1	1	1	1
1	26	3	3	3	1	1	2	#NULL!	#NULL!	1	2	#NULL!	#NULL!	#NULL!	#NULL!	#NULL!	1	1	1	1	1	1	1	1	1	1	1	1	1	1	1	1	1	1	1	1	1	1	1	1	1	1	0	1	1	1	1	1	1
1	16	3	3	3	1	1	1	3	4	1	2	#NULL!	#NULL!	#NULL!	#NULL!	#NULL!	1	1	1	1	1	1	1	1	1	1	1	1	1	1	1	1	1	1	1	1	1	1	1	1	1	1	0	1	1	1	1	1	1
1	19	3	3	3	1	1	1	1	1	1	2	#NULL!	#NULL!	#NULL!	#NULL!	#NULL!	1	1	1	1	1	1	1	1	1	1	1	1	1	1	1	1	1	1	1	1	1	1	1	1	1	1	0	1	1	1	1	1	1
1	14	3	3	2	1	1	1	2	3	1	2	#NULL!	#NULL!	#NULL!	#NULL!	#NULL!	1	1	1	1	1	1	1	1	1	1	1	1	1	1	1	1	1	1	1	1	1	1	1	1	1	1	0	1	1	1	1	1	1
2	23	4	3	4	1	1	1	5	4	1	1	4	2	#NULL!	4	5	3	4	2	3	2	4	3	2	1	1	3	1	1	1	2	1	1	1	1	1	1	2	1	1	1	1	1	2	3	3	1	1	1
1	33	5	3	3	1	1	2	#NULL!	#NULL!	1	2	#NULL!	#NULL!	#NULL!	#NULL!	#NULL!	1	1	1	1	1	1	1	1	1	1	1	1	1	1	1	1	1	1	1	1	1	1	1	1	1	1	0	1	1	1	1	1	1
2	28	5	3	2	1	1	2	#NULL!	#NULL!	1	1	5	5	1	3	6	5	4	2	2	1	1	1	1	1	1	2	1	1	1	1	1	1	1	1	1	1	1	1	1	1	1	0	1	1	1	1	1	1
2	27	5	3	3	1	1	1	4	4	1	1	4	1	#NULL!	3	3	2	1	1	1	1	2	1	1	1	1	1	1	1	1	1	1	1	1	1	1	1	1	1	1	1	1	0	1	1	1	1	1	1
2	34	2	3	3	1	1	2	#NULL!	#NULL!	1	1	4	2	1	2	2	3	3	1	1	1	3	1	3	1	1	3	1	1	1	1	1	1	1	1	1	1	1	1	1	1	1	0	1	2	1	1	2	1
2	25	4	3	4	1	1	2	#NULL!	#NULL!	1	1	2	4	#NULL!	2	4	3	2	1	2	1	2	1	1	2	1	2	1	1	1	1	1	1	1	1	1	1	1	1	1	1	1	0	1	1	1	1	2	3
1	36	3	3	3	2	1	2	#NULL!	#NULL!	1	2	#NULL!	#NULL!	#NULL!	#NULL!	#NULL!	1	1	1	1	1	1	1	1	1	1	1	1	1	1	1	1	1	1	1	1	1	1	1	1	1	1	0	1	1	1	1	1	1
1	23	3	3	3	2	1	2	#NULL!	#NULL!	1	2	#NULL!	#NULL!	#NULL!	#NULL!	#NULL!	1	1	1	1	1	1	1	1	1	1	1	1	1	1	1	1	1	1	1	1	1	1	1	1	1	1	0	1	1	1	1	1	1
1	34	4	3	3	2	1	1	3	4	2	1	3	3	#NULL!	3	6	2	1	1	1	1	2	1	1	1	1	1	1	1	1	1	1	1	1	1	1	1	1	1	1	1	1	0	1	1	1	1	1	2
1	20	2	3	3	2	1	1	1	2	1	2	#NULL!	#NULL!	#NULL!	#NULL!	#NULL!	1	1	1	1	1	1	1	2	1	1	1	1	1	1	1	1	1	1	1	1	1	1	1	1	1	1	0	1	1	1	1	2	2
1	6	2	4	3	2	2	1	1	1	2	2	#NULL!	#NULL!	#NULL!	#NULL!	#NULL!	1	1	1	1	1	1	1	1	1	1	1	1	1	1	1	1	1	1	1	1	1	1	1	1	1	1	0	1	2	2	1	1	1
1	5	1	4	2	2	2	1	2	2	2	2	#NULL!	#NULL!	#NULL!	#NULL!	#NULL!	2	1	1	1	1	1	1	1	1	1	1	1	1	1	1	1	2	2	2	1	2	1	2	1	2	1	1	1	2	2	1	2	2
2	8	2	4	2	2	2	1	3	2	2	2	#NULL!	#NULL!	#NULL!	#NULL!	#NULL!	1	1	1	1	1	4	1	1	1	1	1	1	1	1	1	2	2	2	2	2	1	1	1	1	1	1	1	1	2	1	1	3	2
1	7	2	5	3	2	2	2	#NULL!	#NULL!	1	2	#NULL!	#NULL!	#NULL!	#NULL!	#NULL!	1	1	1	1	1	1	1	1	1	1	1	1	1	1	1	1	1	1	1	1	1	1	1	1	1	1	0	1	1	1	1	1	1
1	22	2	5	2	2	2	2	#NULL!	#NULL!	1	2	#NULL!	#NULL!	#NULL!	#NULL!	#NULL!	1	1	1	1	1	1	1	1	1	1	1	1	1	1	1	1	1	1	1	1	1	1	1	1	1	1	0	1	1	1	1	1	1
1	18	2	5	2	2	2	2	#NULL!	#NULL!	1	2	#NULL!	#NULL!	#NULL!	#NULL!	#NULL!	1	1	1	1	1	1	1	1	1	2	1	1	1	1	1	1	1	1	1	1	1	1	1	1	1	1	0	1	1	1	1	1	1
2	24	2	5	2	2	2	1	4	4	1	2	#NULL!	#NULL!	#NULL!	#NULL!	#NULL!	1	1	1	1	1	1	1	1	1	1	1	1	1	1	1	1	1	1	1	1	1	1	1	1	1	1	0	1	1	1	1	1	1
2	24	2	5	2	2	2	2	#NULL!	#NULL!	1	2	#NULL!	#NULL!	#NULL!	#NULL!	#NULL!	1	1	1	1	1	1	1	1	1	1	1	1	1	1	1	1	1	1	1	1	1	1	1	1	1	1	0	1	1	1	1	1	1
1	31	3	5	2	2	2	1	2	3	1	2	#NULL!	#NULL!	#NULL!	#NULL!	#NULL!	1	1	1	1	1	1	1	1	1	1	1	1	1	1	1	1	1	1	1	1	1	1	1	1	1	1	0	1	1	1	1	1	1
1	20	3	5	2	2	2	1	3	4	1	2	#NULL!	#NULL!	#NULL!	#NULL!	#NULL!	1	1	1	1	1	1	1	1	1	1	1	1	1	1	1	1	1	1	1	1	1	1	1	1	1	1	0	1	1	1	1	1	1
2	23	3	5	2	2	2	2	#NULL!	#NULL!	1	2	#NULL!	#NULL!	#NULL!	#NULL!	#NULL!	1	1	1	1	1	1	1	1	1	1	1	1	1	1	1	1	1	1	1	1	1	1	1	1	1	1	0	1	1	1	1	1	1
2	6	2	5	3	2	2	1	1	2	1	2	#NULL!	#NULL!	#NULL!	#NULL!	#NULL!	3	3	2	1	1	2	1	3	2	1	1	1	1	1	1	1	1	1	1	1	1	1	1	1	1	1	0	1	1	2	1	2	1
1	32	2	5	2	1	1	2	#NULL!	#NULL!	1	2	#NULL!	#NULL!	#NULL!	#NULL!	#NULL!	1	1	1	1	1	1	1	1	1	1	1	1	1	1	1	1	1	1	1	1	1	1	1	1	1	1	0	1	1	1	1	1	1
1	22	2	5	3	1	1	1	2	4	1	2	#NULL!	#NULL!	#NULL!	#NULL!	#NULL!	1	1	1	1	1	1	1	1	1	1	1	1	1	1	1	1	1	1	1	1	1	1	1	1	1	1	0	1	1	1	1	1	1
2	16	2	5	2	1	1	1	4	4	1	1	5	1	1	5	3	4	2	1	1	1	1	1	3	1	1	5	1	1	1	1	1	1	1	1	1	1	1	1	1	1	1	0	1	1	1	1	1	1
2	36	2	5	3	1	1	2	#NULL!	#NULL!	4	2	#NULL!	#NULL!	#NULL!	#NULL!	#NULL!	1	1	1	1	1	1	1	1	1	1	4	1	1	1	1	1	1	1	1	1	2	2	2	2	2	2	1	1	1	1	1	1	2
2	37	2	5	3	1	1	2	#NULL!	#NULL!	4	2	#NULL!	#NULL!	#NULL!	#NULL!	#NULL!	4	4	4	4	4	3	3	1	1	1	2	1	1	1	1	1	2	2	1	1	2	2	1	1	1	1	1	1	1	1	1	1	1
2	16	3	5	3	1	1	2	#NULL!	#NULL!	1	2	#NULL!	#NULL!	#NULL!	#NULL!	#NULL!	1	1	1	1	1	1	1	1	1	1	1	1	1	1	1	1	1	1	1	1	1	1	1	1	1	1	0	1	1	1	1	1	1
2	15	3	5	2	1	1	1	5	4	1	2	#NULL!	#NULL!	#NULL!	#NULL!	#NULL!	1	1	1	1	1	1	1	1	1	1	1	1	1	1	1	1	1	1	1	1	1	1	1	1	1	1	0	1	1	1	1	1	1
2	21	3	5	3	1	1	2	#NULL!	#NULL!	1	2	#NULL!	#NULL!	#NULL!	#NULL!	#NULL!	1	1	1	1	1	1	1	1	1	1	1	1	1	1	1	1	1	1	1	1	1	1	1	1	1	1	0	1	1	1	1	1	1
2	30	4	5	3	1	1	1	4	4	1	1	5	1	#NULL!	1	1	2	1	1	1	1	1	1	2	1	1	5	1	1	1	1	1	1	1	1	1	1	1	1	1	1	1	0	1	1	1	1	1	1
2	11	5	5	2	1	1	1	1	4	1	1	5	1	1	1	1	1	1	1	1	1	1	1	1	1	1	1	1	1	1	1	1	1	1	1	1	1	1	1	1	1	1	0	1	1	1	1	1	1
1	14	3	5	2	1	1	2	#NULL!	#NULL!	1	1	1	5	1	4	4	5	5	5	3	5	4	3	5	4	3	5	1	1	1	1	1	1	1	1	1	1	1	1	1	1	1	0	1	2	1	1	2	2
2	15	3	5	2	1	1	1	4	3	1	1	1	#NULL!	#NULL!	3	4	2	3	1	2	1	1	1	1	2	1	5	1	1	1	1	1	1	1	1	1	1	1	1	1	1	1	0	1	1	1	1	2	1
1	6	3	6	3	2	2	1	1	1	1	2	#NULL!	#NULL!	#NULL!	#NULL!	#NULL!	1	1	1	1	1	1	1	1	1	1	1	1	1	1	1	1	1	1	1	1	1	1	1	1	1	1	0	1	1	1	1	1	1
1	29	3	6	3	1	1	1	2	4	1	2	#NULL!	#NULL!	#NULL!	#NULL!	#NULL!	1	1	1	1	1	1	1	1	1	1	1	1	1	1	1	1	1	1	1	1	1	1	1	1	1	1	0	1	1	1	1	1	1
1	18	3	6	3	1	1	1	2	2	2	2	5	#NULL!	#NULL!	#NULL!	#NULL!	1	1	1	1	1	1	1	2	1	1	1	1	1	1	1	1	1	1	1	1	1	1	1	1	1	1	0	1	1	1	1	1	1
1	25	4	6	3	1	1	2	#NULL!	#NULL!	1	2	#NULL!	#NULL!	#NULL!	#NULL!	#NULL!	1	1	1	1	1	1	1	1	1	1	1	1	1	1	1	1	1	1	1	1	1	1	1	1	1	1	0	1	1	1	1	1	1
1	26	5	6	4	1	1	1	4	4	1	2	#NULL!	#NULL!	#NULL!	#NULL!	#NULL!	1	1	1	1	1	1	1	1	1	1	1	1	1	1	1	1	1	1	1	1	1	1	1	1	1	1	0	1	1	1	1	1	1
1	33	3	6	4	2	1	2	#NULL!	#NULL!	2	1	5	1	#NULL!	2	1	2	3	2	3	2	3	2	1	2	1	2	1	1	1	1	1	1	1	1	1	1	1	1	1	1	1	0	1	1	1	1	1	1
1	10	2	7	2	1	2	2	#NULL!	#NULL!	4	2	#NULL!	#NULL!	#NULL!	#NULL!	#NULL!	1	1	1	1	1	1	1	1	1	1	1	1	1	1	1	1	1	1	1	1	1	1	1	1	1	1	0	1	1	1	1	1	1
1	7	2	7	2	1	2	1	4	3	2	2	#NULL!	#NULL!	#NULL!	#NULL!	#NULL!	1	1	1	1	1	1	1	1	1	1	1	1	1	1	1	1	1	1	1	1	1	1	1	1	1	1	0	1	1	1	1	1	1
1	34	2	7	2	1	2	2	#NULL!	#NULL!	1	2	#NULL!	#NULL!	#NULL!	#NULL!	#NULL!	1	1	1	1	1	1	1	1	1	1	1	1	1	1	1	1	1	1	1	1	1	1	1	1	1	1	0	1	1	1	1	1	1
1	12	3	7	3	1	2	2	#NULL!	#NULL!	1	2	#NULL!	#NULL!	#NULL!	#NULL!	#NULL!	1	1	1	1	1	1	1	1	1	1	1	1	1	1	1	1	1	1	1	1	1	1	1	1	1	1	0	1	1	1	1	1	1
2	6	4	7	2	1	2	1	3	3	1	2	#NULL!	#NULL!	#NULL!	#NULL!	#NULL!	1	1	1	1	1	1	1	1	1	1	1	1	1	1	1	1	1	1	1	1	1	1	1	1	1	1	0	1	1	1	1	1	1
1	3	2	7	6	2	2	1	1	1	4	2	#NULL!	#NULL!	#NULL!	#NULL!	#NULL!	1	1	1	1	1	1	1	1	1	1	1	1	1	1	1	1	1	1	1	1	1	1	1	1	1	1	0	1	1	1	1	1	1
1	6	2	7	3	2	2	2	#NULL!	#NULL!	1	2	#NULL!	#NULL!	#NULL!	#NULL!	#NULL!	1	1	1	1	1	1	1	1	1	1	1	1	1	1	1	1	1	1	1	1	1	1	1	1	1	1	0	1	1	1	1	1	1
1	6	2	7	3	2	2	2	#NULL!	#NULL!	1	2	#NULL!	#NULL!	#NULL!	#NULL!	#NULL!	1	1	1	1	1	1	1	1	1	1	1	1	1	1	1	1	1	1	1	1	1	1	1	1	1	1	0	1	1	1	1	1	1
1	8	3	7	3	2	2	1	3	2	1	2	#NULL!	#NULL!	#NULL!	#NULL!	#NULL!	1	1	1	1	1	1	1	1	1	1	1	1	1	1	1	1	1	1	1	1	1	1	1	1	1	1	0	1	1	1	1	1	1
1	12	3	7	3	2	2	2	#NULL!	#NULL!	1	2	#NULL!	#NULL!	#NULL!	#NULL!	#NULL!	1	1	1	1	1	1	1	1	1	1	1	1	1	1	1	1	1	1	1	1	1	1	1	1	1	1	0	1	3	1	1	1	1
1	17	3	7	3	2	2	2	#NULL!	#NULL!	1	2	#NULL!	#NULL!	#NULL!	#NULL!	#NULL!	1	1	1	1	1	1	1	2	1	1	1	1	1	1	2	1	1	1	1	1	1	1	1	1	1	1	0	1	1	1	1	1	1
1	12	3	7	3	2	2	2	#NULL!	#NULL!	1	2	#NULL!	#NULL!	#NULL!	#NULL!	#NULL!	1	1	1	1	1	1	1	1	1	1	1	1	1	1	1	1	1	1	1	1	1	1	1	1	1	1	0	1	1	1	1	1	1
1	9	3	7	3	2	2	1	1	3	2	2	#NULL!	#NULL!	#NULL!	#NULL!	#NULL!	1	1	1	1	1	1	1	1	1	1	1	1	1	1	1	1	1	1	1	1	1	1	1	1	1	1	0	1	1	1	1	1	1
1	28	3	7	3	2	2	2	#NULL!	#NULL!	2	2	#NULL!	#NULL!	#NULL!	#NULL!	#NULL!	1	1	1	1	1	1	1	1	1	1	1	1	1	1	1	1	1	1	1	1	1	1	1	1	1	1	0	1	1	1	1	1	1
2	26	2	7	3	1	1	1	2	4	6	2	#NULL!	#NULL!	#NULL!	#NULL!	#NULL!	1	1	1	1	1	1	1	1	1	1	1	1	1	1	1	1	1	1	1	1	1	1	1	1	1	1	0	1	1	1	1	1	1
1	27	3	7	3	1	1	1	3	4	6	1	3	1	#NULL!	3	5	2	1	1	1	1	1	1	1	1	1	1	1	1	1	3	1	1	1	1	1	1	1	1	1	1	1	0	1	1	1	1	1	1
1	14	3	7	3	1	1	2	#NULL!	#NULL!	1	1	5	1	#NULL!	3	2	2	1	1	1	1	1	1	1	1	1	1	1	1	1	1	1	1	1	1	1	1	1	1	1	1	1	0	1	1	1	1	1	1
1	15	3	7	3	1	1	1	3	3	4	1	4	1	1	2	1	3	2	2	2	1	2	2	1	2	1	1	1	1	1	1	1	1	1	1	1	1	1	1	1	1	1	0	1	1	1	1	1	1
1	16	3	7	3	1	1	2	#NULL!	#NULL!	4	2	#NULL!	#NULL!	#NULL!	#NULL!	#NULL!	1	1	1	1	1	1	1	1	1	1	1	1	1	1	1	1	1	1	1	1	1	1	1	1	1	1	0	1	1	1	1	1	1
1	22	3	7	3	1	1	2	#NULL!	#NULL!	1	2	#NULL!	#NULL!	#NULL!	#NULL!	#NULL!	1	1	1	1	1	1	1	1	1	1	1	1	1	1	1	1	1	1	1	1	1	1	1	1	1	1	0	1	1	1	1	1	1
1	25	3	7	3	1	1	1	2	3	1	2	#NULL!	#NULL!	#NULL!	#NULL!	#NULL!	1	1	1	1	1	1	1	1	1	1	1	1	1	1	1	1	1	1	1	1	1	1	1	1	1	1	0	1	1	1	1	1	1
1	16	3	7	3	1	1	2	#NULL!	#NULL!	1	2	5	#NULL!	#NULL!	#NULL!	#NULL!	1	1	1	1	1	1	1	1	1	1	1	1	1	1	1	1	1	1	1	1	1	1	1	1	1	1	0	1	1	1	1	1	1
1	24	3	7	4	1	1	1	2	4	1	2	#NULL!	#NULL!	#NULL!	#NULL!	#NULL!	1	1	1	1	1	1	1	3	1	1	1	1	1	1	1	1	1	1	1	1	1	1	1	1	1	1	0	1	1	1	1	1	1
1	8	3	7	3	1	1	2	#NULL!	#NULL!	1	2	#NULL!	#NULL!	#NULL!	#NULL!	#NULL!	1	1	1	1	1	1	1	1	1	1	1	1	1	1	1	1	1	1	1	1	1	1	1	1	1	1	0	1	1	1	1	1	1
1	31	3	7	4	1	1	1	1	4	4	2	#NULL!	#NULL!	#NULL!	#NULL!	#NULL!	1	1	1	1	1	1	1	1	1	1	1	1	1	1	1	1	1	1	1	1	1	1	1	1	1	1	0	1	1	1	1	1	1
1	17	3	7	3	1	1	2	#NULL!	#NULL!	1	2	#NULL!	#NULL!	#NULL!	#NULL!	#NULL!	1	1	1	1	1	1	1	1	1	1	1	1	1	1	1	1	1	1	1	1	1	1	1	1	1	1	0	1	1	1	1	1	1
1	25	3	7	3	1	1	2	#NULL!	#NULL!	1	2	#NULL!	#NULL!	#NULL!	#NULL!	#NULL!	1	1	1	1	1	1	1	1	1	1	1	1	1	1	1	1	1	1	1	1	1	1	1	1	1	1	0	1	1	1	1	1	1
2	25	3	7	3	1	1	1	3	4	1	1	1	5	1	4	2	4	4	3	4	4	3	2	3	3	3	3	1	3	1	1	1	1	1	1	1	1	1	1	1	1	1	0	1	1	1	1	1	1
1	28	4	7	3	1	1	1	4	4	2	2	#NULL!	#NULL!	#NULL!	#NULL!	#NULL!	1	1	1	1	1	1	1	2	1	1	5	1	1	1	1	1	1	1	1	1	1	1	1	1	1	1	0	1	1	1	1	1	1
2	12	4	7	4	1	1	1	1	3	1	2	#NULL!	#NULL!	#NULL!	#NULL!	#NULL!	4	4	4	4	4	4	4	4	4	4	4	3	4	4	4	1	1	1	1	1	1	1	1	1	1	1	0	1	1	1	1	1	1
1	28	5	7	3	1	1	2	#NULL!	#NULL!	2	2	#NULL!	#NULL!	#NULL!	#NULL!	#NULL!	1	1	1	1	1	1	1	1	1	1	1	1	1	1	1	1	1	1	1	1	1	1	1	1	1	1	0	1	1	1	1	1	1
1	26	3	7	4	2	1	1	3	4	6	1	5	1	#NULL!	3	1	1	1	1	1	1	1	1	1	1	1	1	1	1	1	1	1	1	1	1	1	1	1	1	1	1	1	0	1	1	1	1	1	1
1	20	3	7	5	2	1	2	#NULL!	#NULL!	3	2	#NULL!	#NULL!	#NULL!	#NULL!	#NULL!	1	2	1	1	1	1	1	1	1	1	1	1	1	1	1	1	1	1	1	1	1	1	1	1	1	1	0	1	1	1	1	1	1
1	35	3	7	3	2	1	2	#NULL!	#NULL!	2	2	#NULL!	#NULL!	#NULL!	#NULL!	#NULL!	1	1	1	1	1	1	1	1	1	1	5	1	1	1	1	1	1	1	1	1	1	1	1	1	1	1	0	1	1	1	1	1	1
2	28	3	7	3	2	1	1	4	4	1	1	5	1	#NULL!	1	1	1	1	1	1	1	1	1	1	1	1	1	1	1	1	1	1	1	1	1	1	1	1	1	1	1	1	0	1	1	1	1	1	1
1	14	3	8	3	2	2	1	1	2	1	1	5	1	#NULL!	2	3	1	1	1	1	1	3	1	3	1	1	1	1	1	1	1	2	1	1	1	1	1	1	1	1	1	1	1	1	2	1	1	1	1
1	12	3	8	3	2	2	2	#NULL!	#NULL!	1	2	#NULL!	#NULL!	#NULL!	#NULL!	#NULL!	1	1	1	1	1	1	1	1	1	1	1	1	1	1	1	1	1	1	1	1	1	1	1	1	1	1	0	1	1	1	1	1	1
2	8	1	9	3	2	2	2	1	#NULL!	1	2	#NULL!	#NULL!	#NULL!	#NULL!	#NULL!	1	1	1	1	1	1	1	1	1	1	1	1	1	3	1	1	1	1	1	1	1	1	1	1	1	1	0	1	1	1	1	1	1
2	6	1	9	2	2	2	1	3	3	1	2	#NULL!	#NULL!	#NULL!	#NULL!	#NULL!	1	1	1	1	1	1	1	1	1	1	1	1	1	1	1	1	1	1	1	1	1	1	1	1	1	1	0	1	1	1	1	1	1
1	9	2	9	4	2	2	2	#NULL!	#NULL!	4	2	#NULL!	#NULL!	#NULL!	#NULL!	#NULL!	1	1	1	1	1	1	1	1	1	1	1	1	1	1	1	1	1	1	1	1	1	1	1	1	1	1	0	1	1	1	1	1	1
1	26	3	9	4	2	2	2	#NULL!	#NULL!	1	2	#NULL!	#NULL!	#NULL!	#NULL!	#NULL!	1	1	1	1	1	1	1	1	1	1	1	1	1	1	1	1	1	1	1	1	1	1	1	1	1	1	0	1	1	1	1	1	1
1	21	3	9	4	2	2	1	4	4	1	1	1	1	1	1	1	3	4	3	2	4	4	3	5	3	4	2	4	3	4	1	2	1	1	2	3	2	1	1	1	1	2	1	1	1	2	1	2	2
1	1	3	9	5	2	2	2	#NULL!	#NULL!	6	2	#NULL!	#NULL!	#NULL!	#NULL!	#NULL!	2	1	1	2	1	2	1	2	1	1	1	1	1	2	1	1	1	1	1	1	1	1	1	1	1	1	0	1	2	2	1	2	2
1	28	3	9	3	1	1	1	2	4	1	1	1	1	#NULL!	2	3	1	2	1	1	1	2	1	2	1	1	5	1	1	1	2	1	1	1	1	1	1	1	1	1	1	1	0	1	1	1	1	1	1
1	31	3	9	3	1	1	2	#NULL!	#NULL!	1	1	2	1	#NULL!	2	2	1	2	1	1	1	1	1	3	1	1	1	1	1	1	1	1	1	1	1	1	1	1	1	1	1	1	0	1	1	1	1	1	1
2	19	3	9	3	2	1	2	#NULL!	#NULL!	2	1	1	4	#NULL!	3	3	2	3	2	3	2	2	1	2	1	1	2	1	3	2	1	1	1	1	1	1	1	1	1	1	1	1	0	1	1	1	1	1	1
[truncated: 39 more columns]

## Sheet: Sayfa1
gender: 1. Female, 2. Male
income status: 1. Minimum Wage and below, 2.Minimum Wage-5,000 TL, 3. 5.001-10.000 TL, 4.10,001-15,000 TL, 5. 15.001 TL and above
occupation: 1. specialist physician, 2. general practitioner, 3. IT personnel, 4. cleaning staff, 5. security personnel, 6. midwife, 7. nurse, 8. physiotherapist, 9. psychologist
marital status: 1. married 2. single
having child: 1. yes 2.no
educational status: 1. primary education, 2. high school, 3. university, 4. master's degree, 5. doctorate, 6. other
Smoking usage: 1. yes 2.no
Number of cigarettes: 1.1-5, 2.6-10, 3. 11-15, 4. 16-20, 5. 20+
Smoking duration: 1.0-1, 2. 1-5, 3. 5-10, 4. 10+
Psychiatric disorder: 1. none, 2. depression, 3. bipolar disorder, 4. anxiety disorder, 5. psychotic disorder, 6. other
Cryptocurrency trading: 1. yes 2.no
Cryptocurrency value tracking: 1. more than three times a day, 2. 3 times a day, 3. once a day, 4. several times a week, 5. less frequently
Frequency of cryptocurrency trading: 1. once in a month, 2. 2-3 times in a month, 3. once a week, 4. 2-3 times in a week, 5. daily
Average daily trading volume: 1. 1-3, 2. 4-10, 3. 10+
Duration of trades: 1. less than 6 months, 2. 6 months- 1 year, 3. 1 year- 2 year, 4. 2 year-3 year, 5. 3 year+
Average trading amount: 1. 0-1000, 2. 1001-3000, 3. 3001-5000, 4. 5000-10000, 5. 10001-15000, 6. 15001+
